# Supplementary material for: A model based on Rock-Eval thermal analysis to quantify the size of the centennially persistent organic carbon pool in temperate soils
Source: Copernicus journal article supplement (doi:10.5194/bg-2018-15), 2018-02-07
Supplement: Supplementary file 1 [file bg-2018-15-supplement.pdf]

## Supplementary material to:

### A model based on Rock-Eval thermal analysis to quantify the size of the centennially persistent organic carbon pool in temperate soils

5 Lauric Cécillon<sup>1,2</sup>, François Baudin<sup>3</sup>, Claire Chenu<sup>4</sup>, Sabine Houot<sup>4</sup>, Romain Jolivet<sup>2</sup>, Thomas Kätterer<sup>5</sup>, Suzanne Lutfalla<sup>2</sup>, Andy Macdonald<sup>6</sup>, Folkert van Oort<sup>4</sup>, Alain F. Plante<sup>7</sup>, Florence Savignac<sup>3</sup>, Laure Soucémariadin<sup>2</sup>, Pierre Barré<sup>2</sup>

<sup>1</sup>Université Grenoble Alpes, Irstea, UR EMGR, F-38402 St-Martin-d'Hères, France

<sup>2</sup>Laboratoire de Géologie de l'ENS, PSL Research University, CNRS UMR 8538, F-75005, Paris, France

10 <sup>3</sup>Sorbonne Université-UPMC-Univ Paris 06, Institut des Sciences de la Terre de Paris, F-75005 Paris, France

<sup>4</sup>AgroParisTech - INRA, UMR 1402 ECOSYS, F-78850 Thiverval-Grignon, France

<sup>5</sup>Department of Ecology, Swedish University of Agricultural Sciences, 750 07 Uppsala, Sweden

<sup>6</sup>Department of Sustainable Agriculture Sciences, Rothamsted Research, Harpenden, Hertfordshire, AL5 2JQ, UK

<sup>7</sup>Earth and Environmental Science, University of Pennsylvania, Philadelphia, USA

15 *Correspondence to:* Lauric Cécillon (lauric.cecillon@irstea.fr)

**Supplementary material S1: Basic characteristics of the four long-term agronomic experimental sites used for the reference soil sample set.**  
**Abbreviation: *LTFB*, long-term bare fallow.**

| Site                          | Latitude,<br>longitude | Mean annual<br>temperature<br>(°C) | Mean annual<br>precipitation<br>(mm) | Land use<br>before<br>experiment | Sampling<br>depth (cm) | Soil texture<br>(%, clay/silt/sand) |
|-------------------------------|------------------------|------------------------------------|--------------------------------------|----------------------------------|------------------------|-------------------------------------|
| Versailles, France            | 48°48N, 2°08E          | 10.7                               | 628                                  | grassland                        | 25                     | 17/57/26                            |
| Rothamsted,<br>United Kingdom | 51°82N, 0°35E          | 9.5                                | 712                                  | grassland                        | 23                     | 25/62/13                            |
| Ultuna, Sweden                | 59°49N, 17°38E         | 5.5                                | 533                                  | arable                           | 20                     | 36/41/23                            |
| Grignon, France               | 48°51N, 1°55E          | 10.7                               | 649                                  | grassland                        | 25                     | 16/54/30                            |

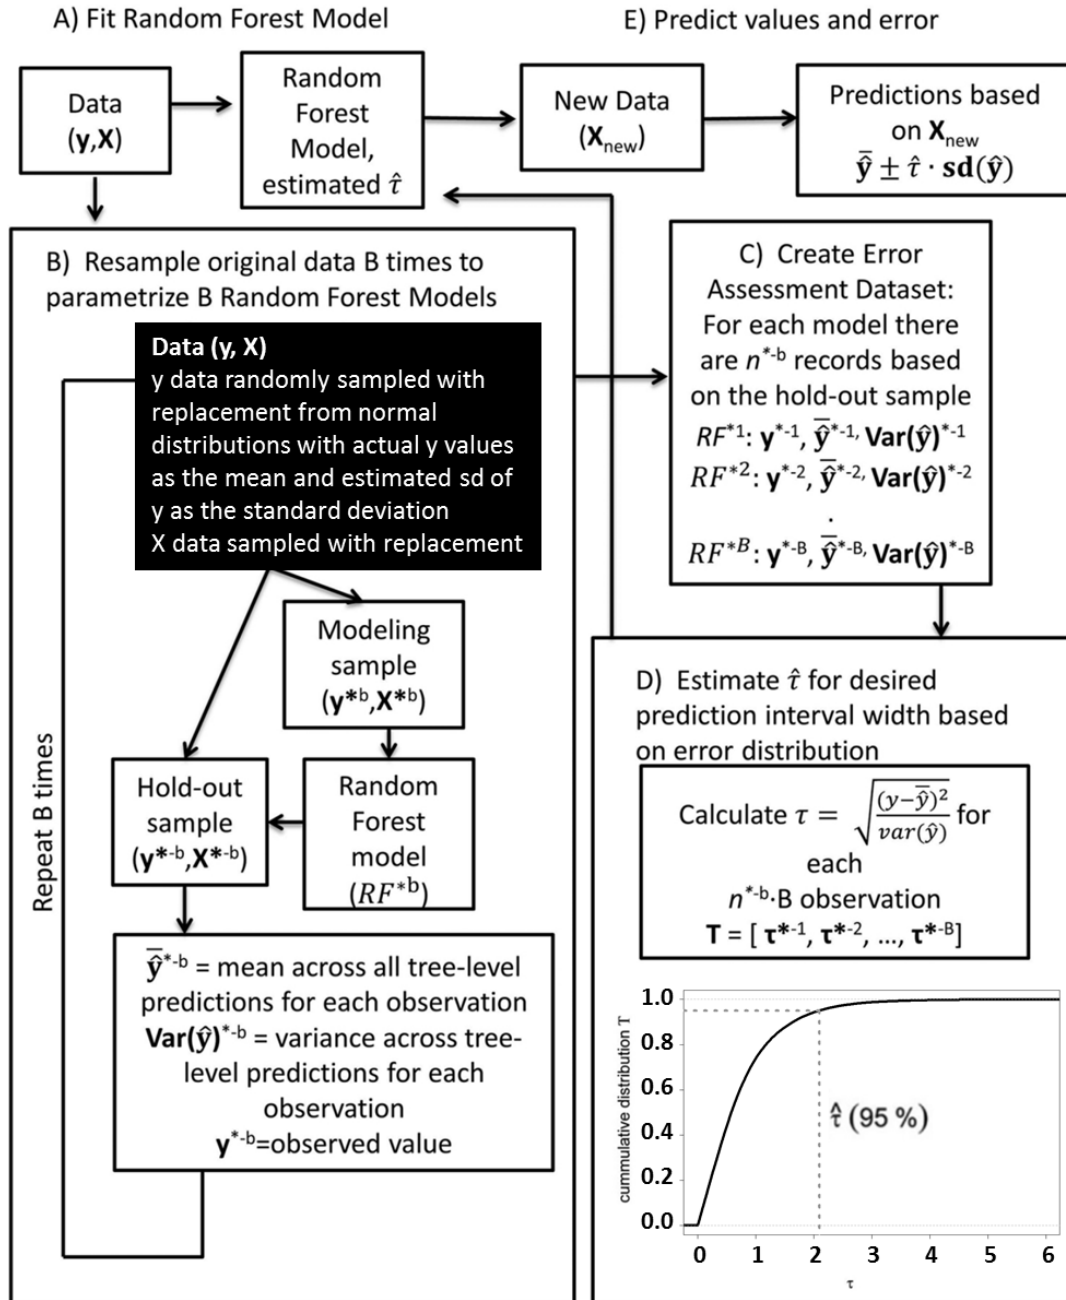

Supplementary material S2: Error propagation scheme in the random forests regression model (adapted from Coulston *et al.* (2016) and modified).

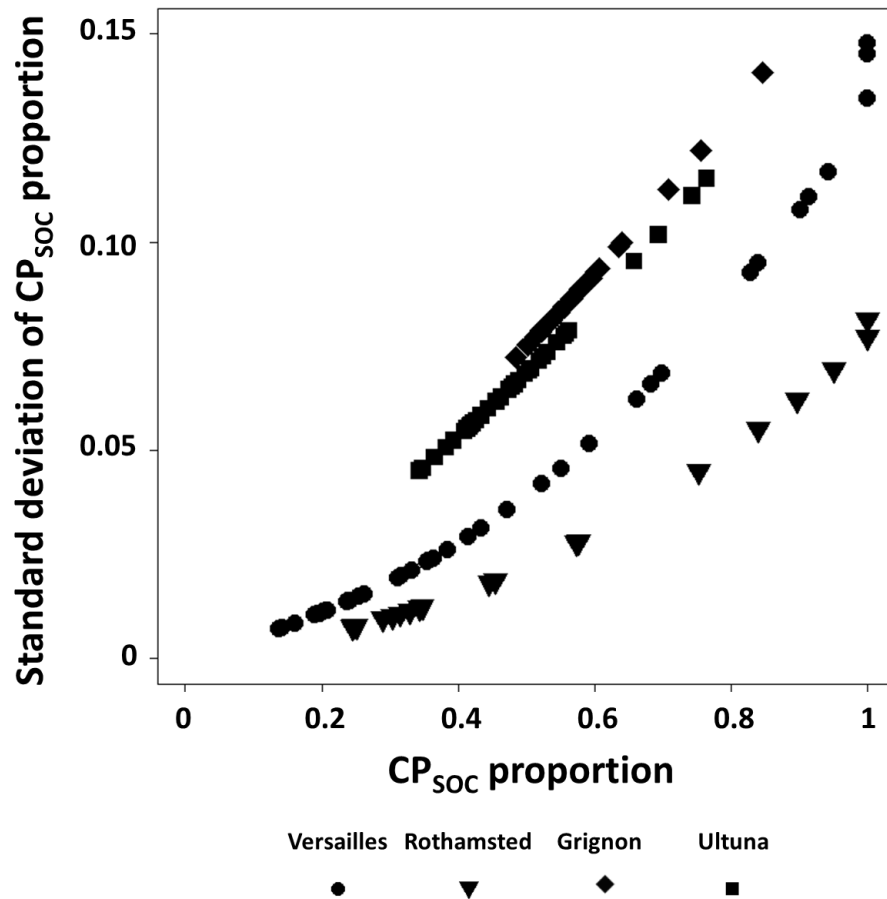

5 **Supplementary material S3: Standard deviation of the  $CP_{soc}$  proportion as a function of the  $CP_{soc}$  proportion in the reference soil sample set (n = 118).**

### Supplementary reference

Coulston, J.W., Blinn, C.E., Thomas, V.A., and Wynne, R.H.: Approximating prediction uncertainty for random forest regression models. *Photogramm. Eng. Remote Sens.*, 82, 189–197, 2016.
